# Supplementary material for: Identification of DNA methylation biomarkers for risk of liver metastasis in early-stage colorectal cancer
Source: PubMed Central journal article supplement (PMC8190869; doi:10.1186/s13148-021-01108-3), 2021-06-09

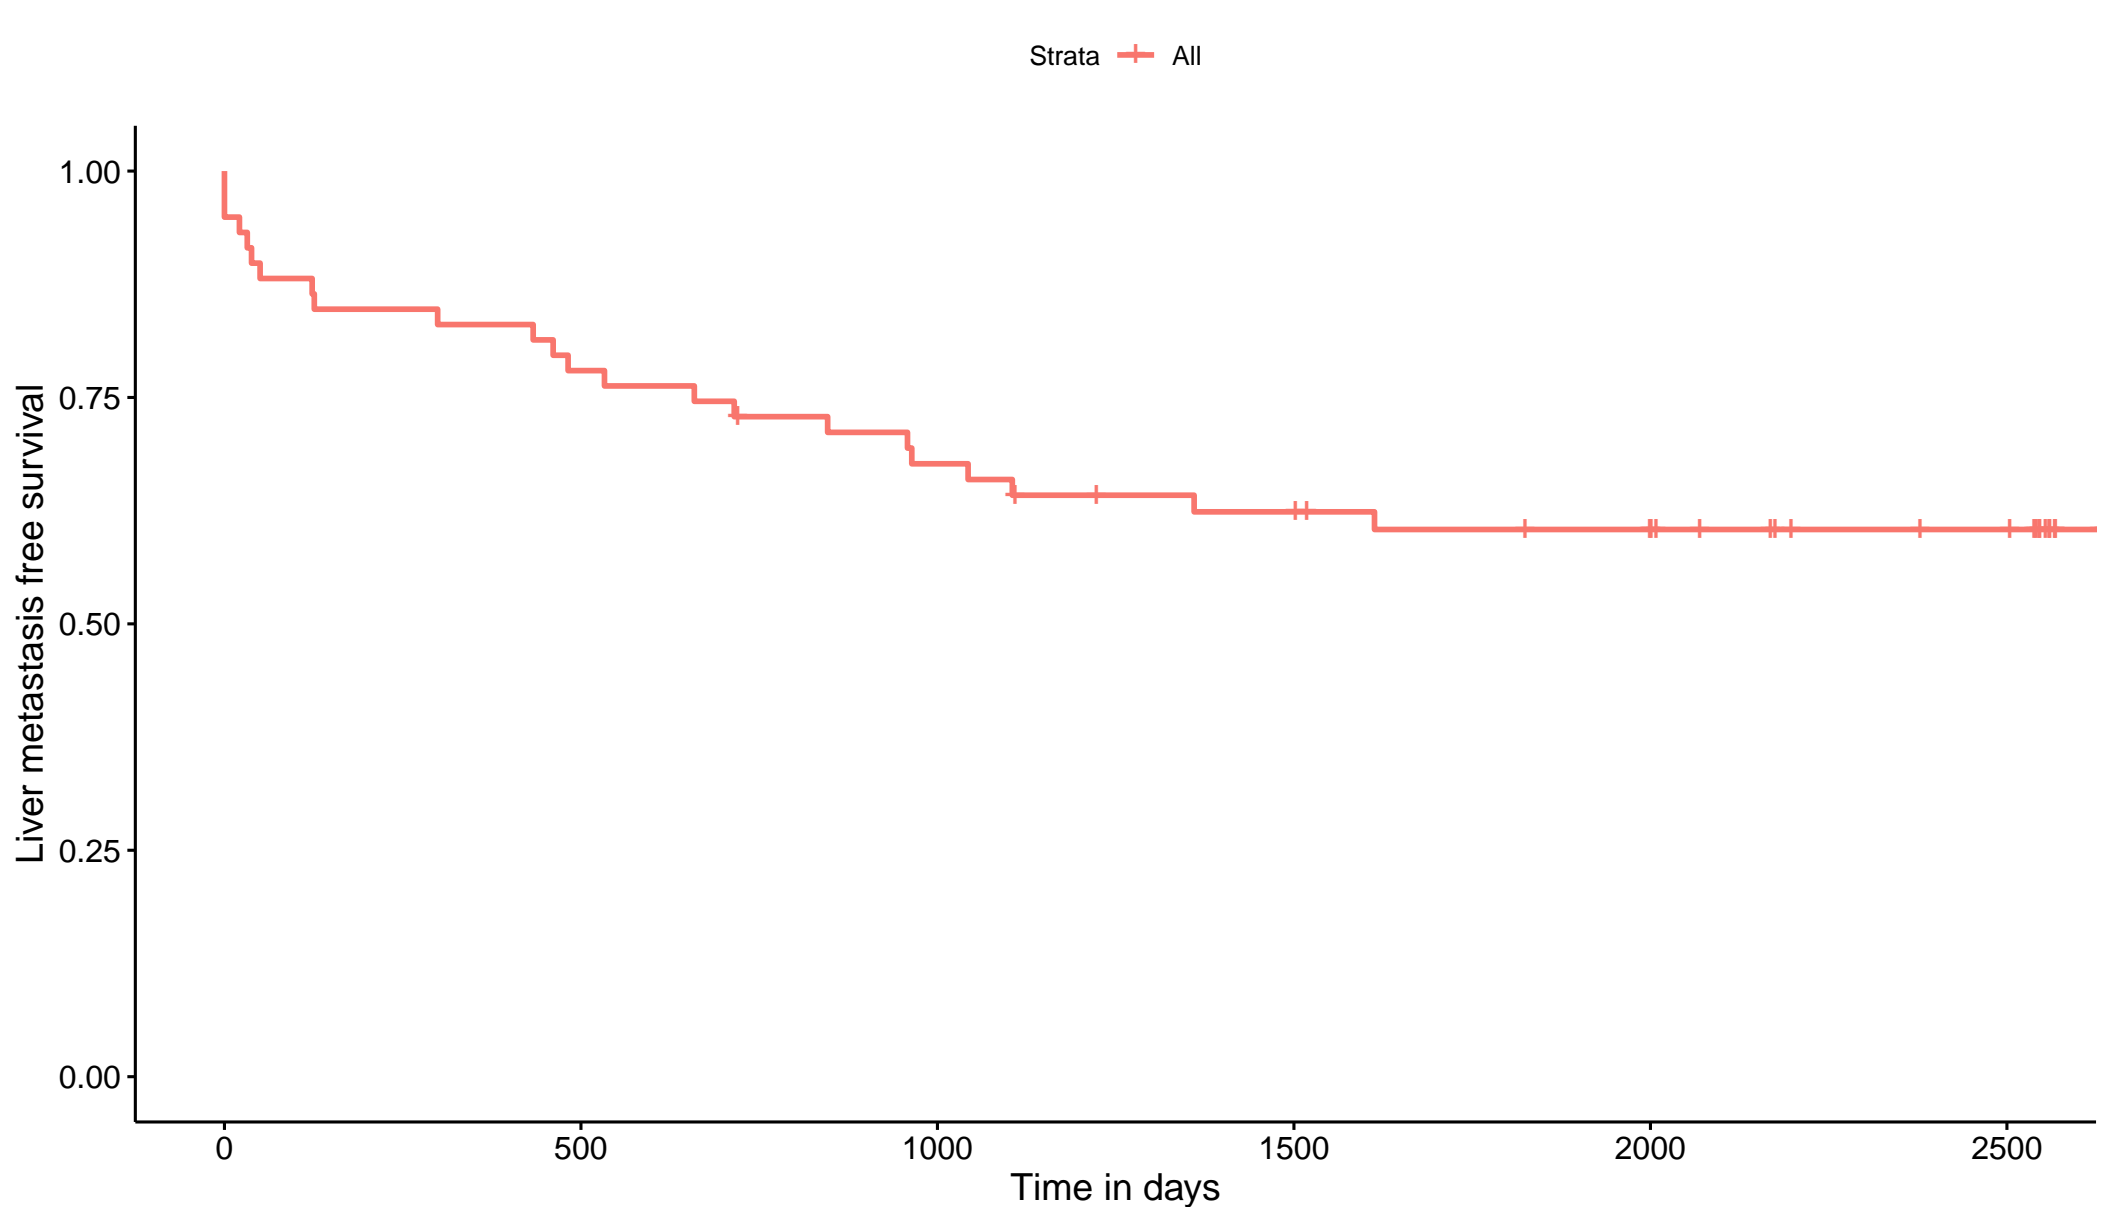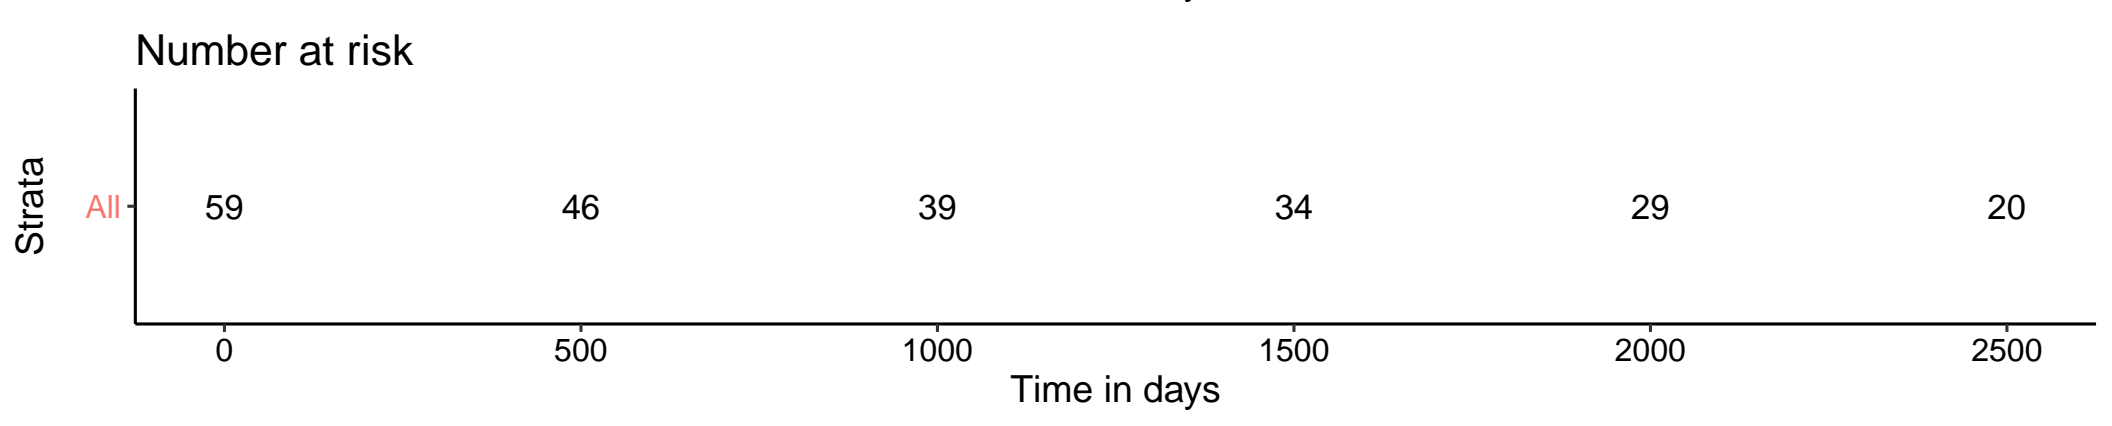

Supplement: 13148_2021_1108_MOESM1_ESM.pdf [file 13148_2021_1108_MOESM1_ESM.pdf]
